# Supplementary material
Source: PubMed Central journal article supplement (PMC8315306)

Suppl. Fig. S1

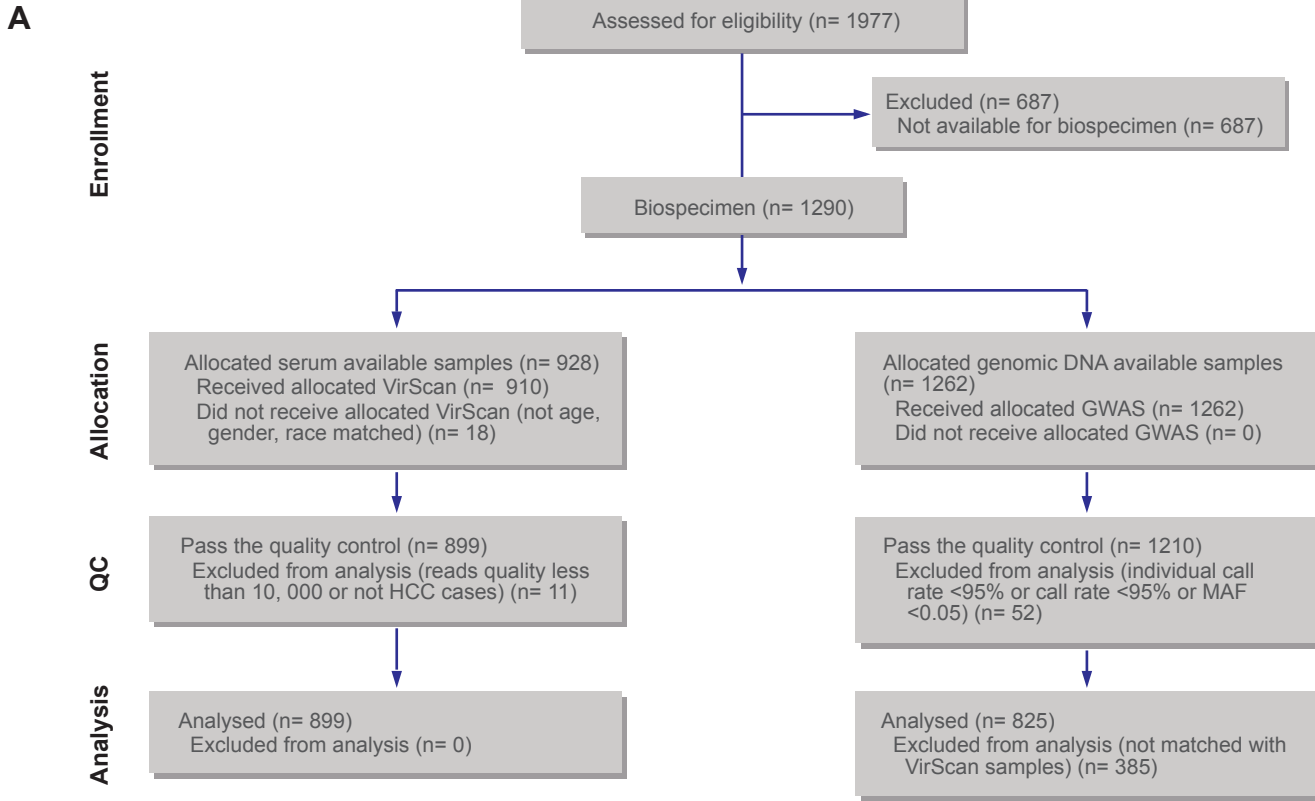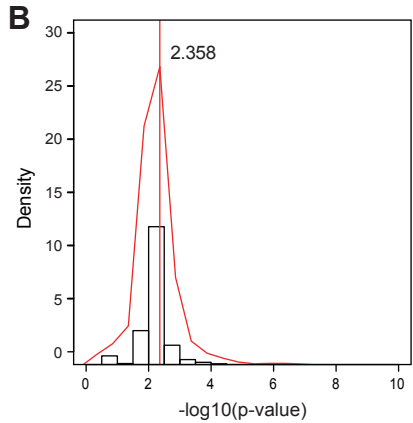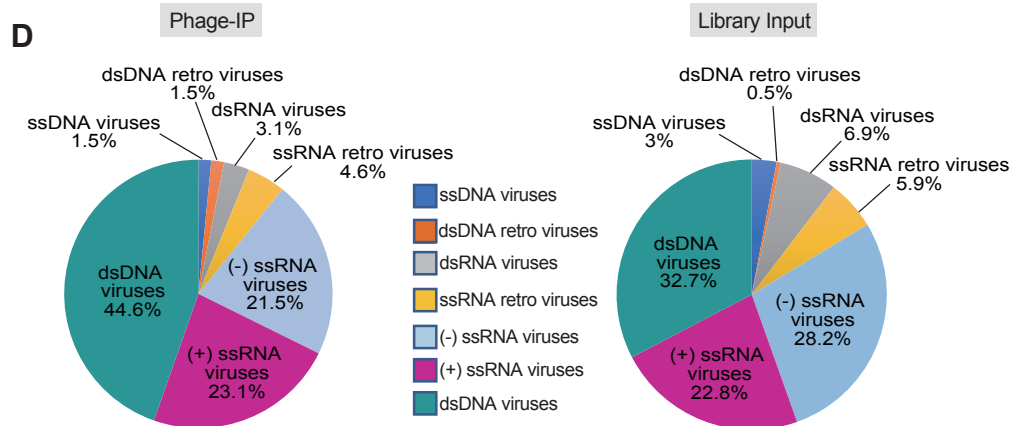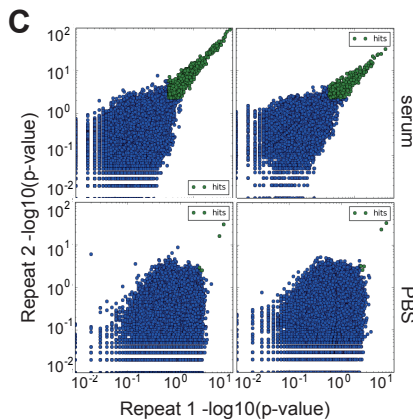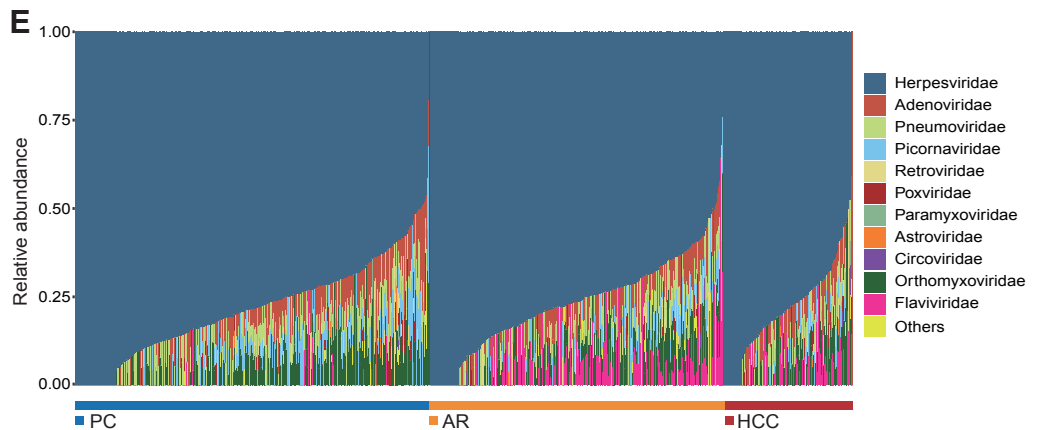

Supplement: NIHMS1598384-supplement-1.pdf [file NIHMS1598384-supplement-1.pdf]

Suppl. Fig. S2

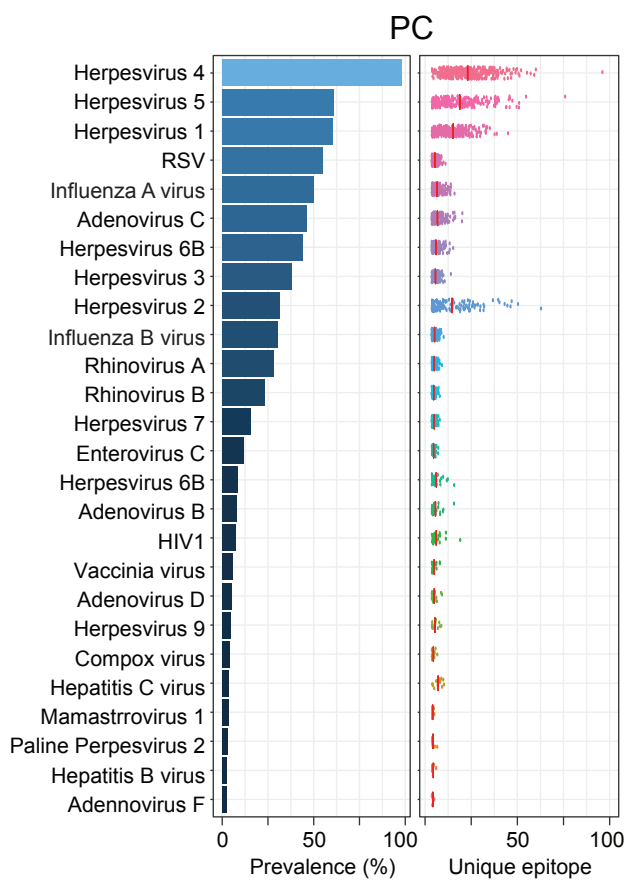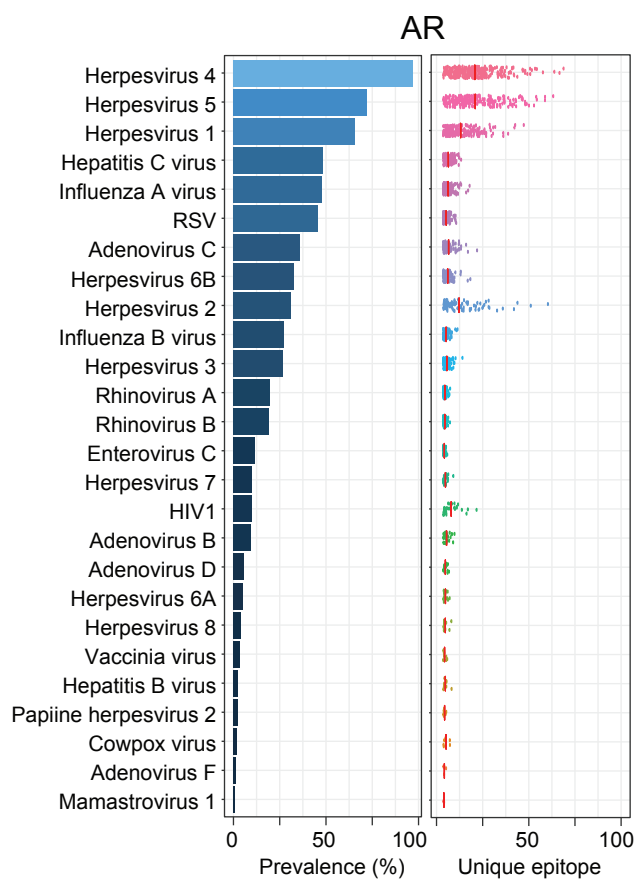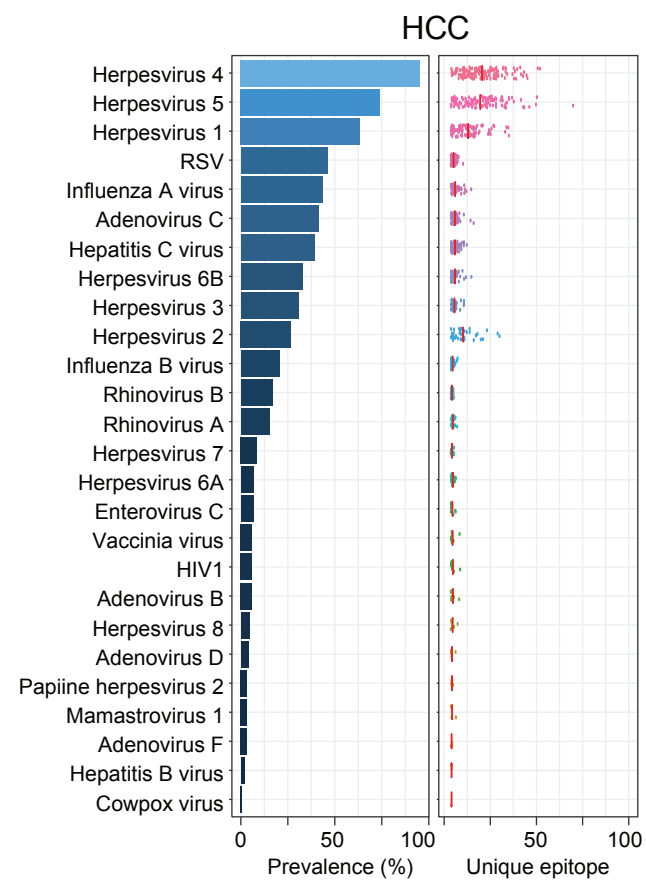

Supplement: NIHMS1598384-supplement-2.pdf [file NIHMS1598384-supplement-2.pdf]

# Suppl. Fig. S3

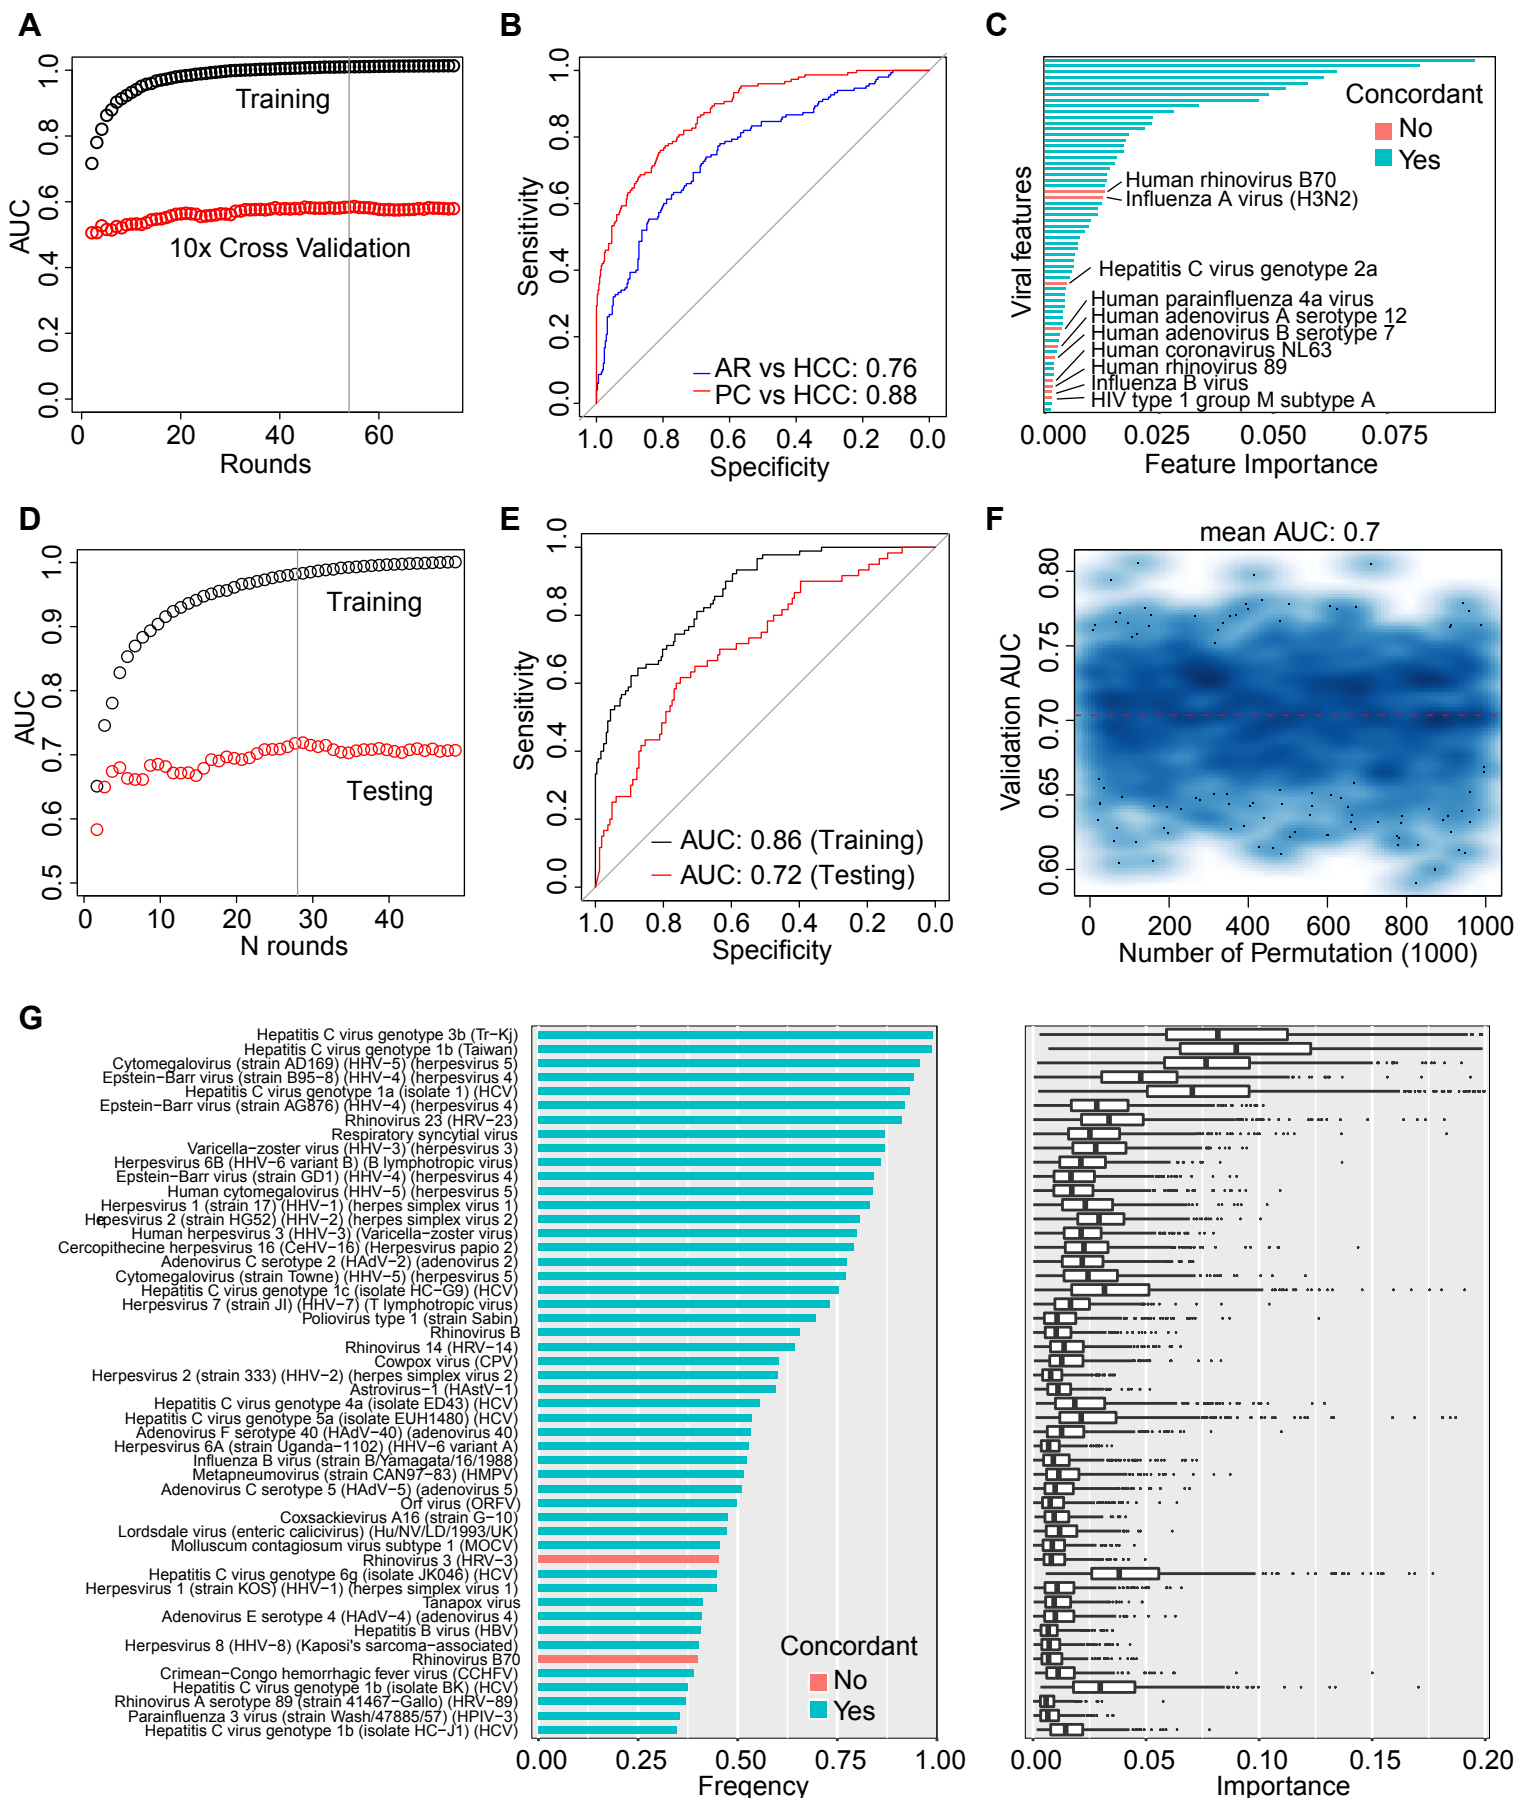

Supplement: NIHMS1598384-supplement-3.pdf [file NIHMS1598384-supplement-3.pdf]

Suppl. Fig. S4

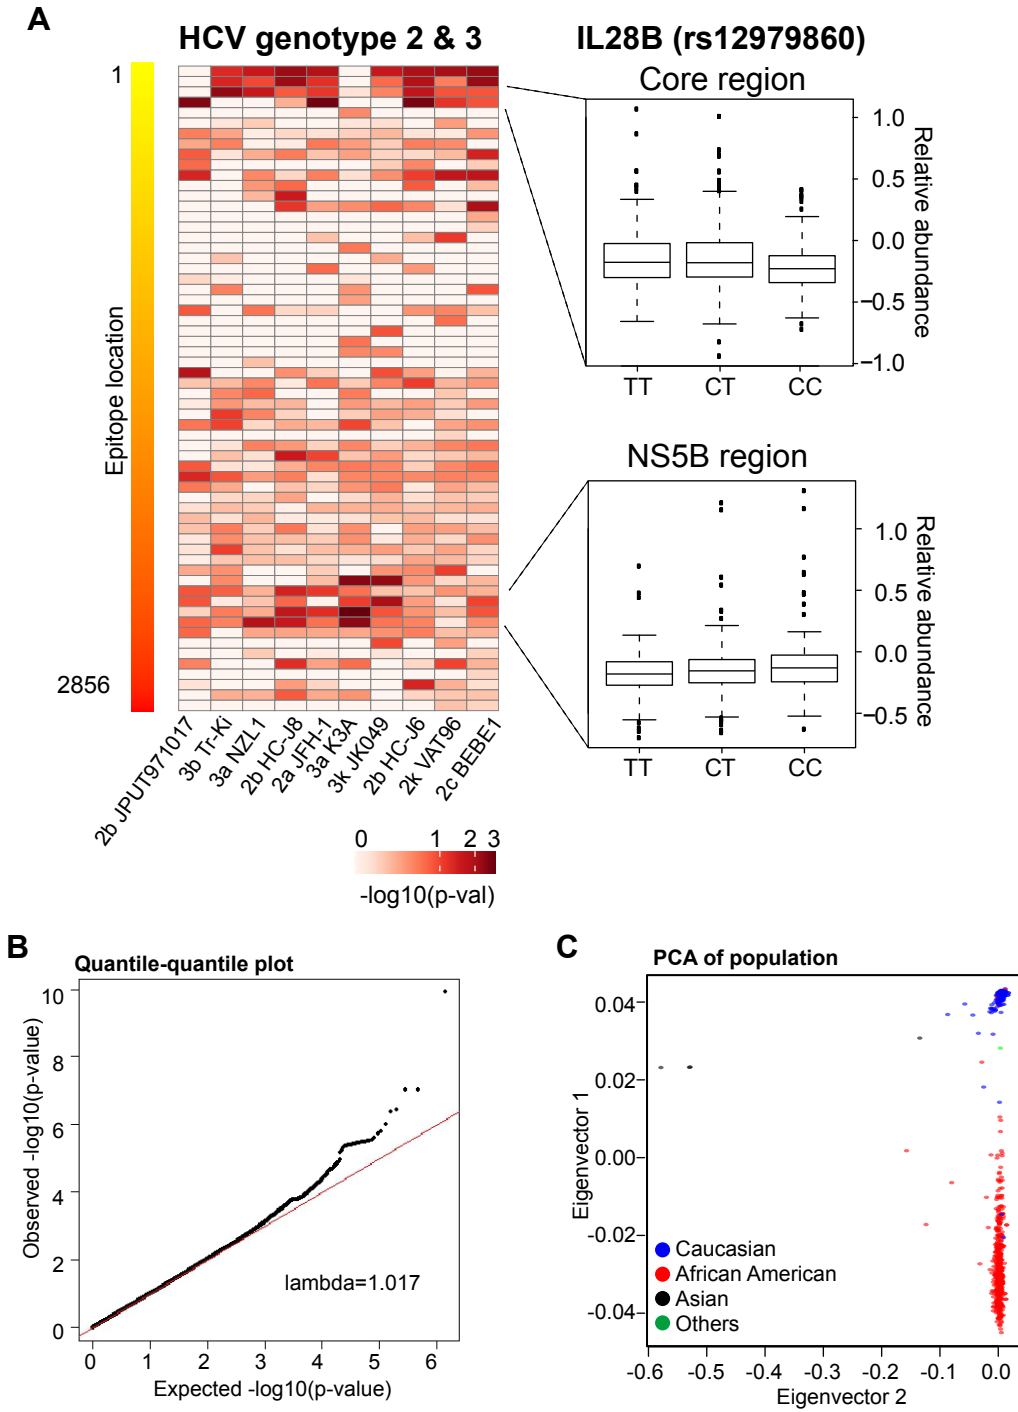

Supplement: NIHMS1598384-supplement-4.pdf [file NIHMS1598384-supplement-4.pdf]

Suppl. Fig. S5

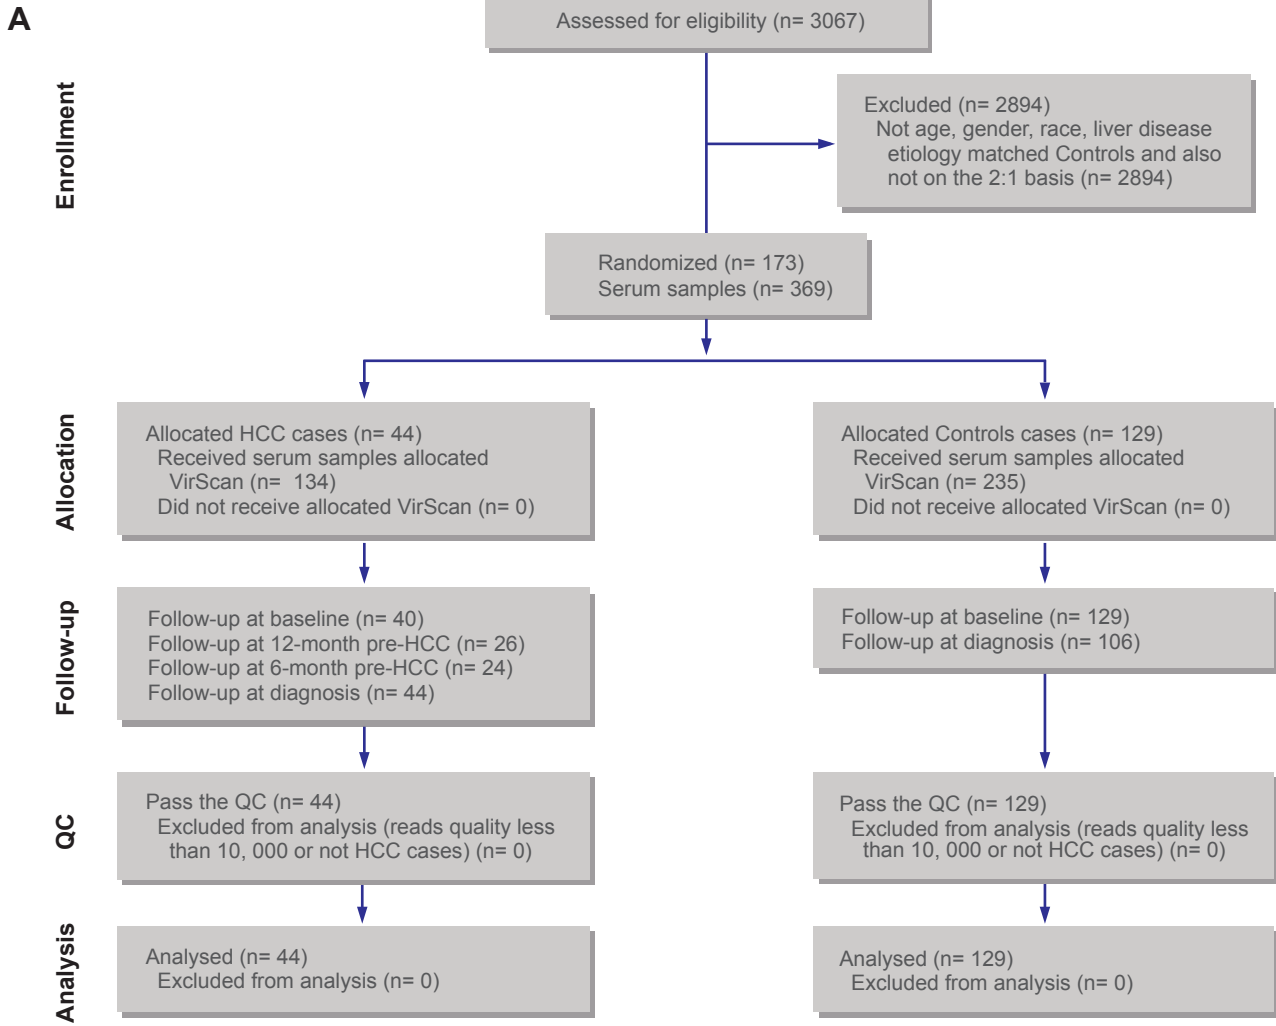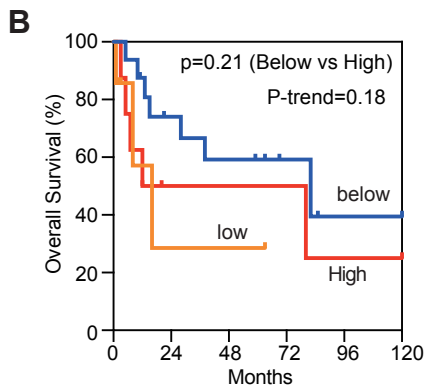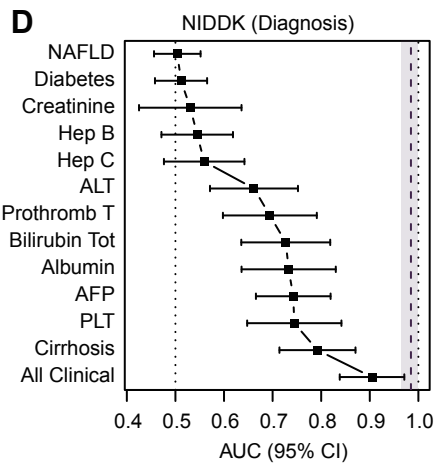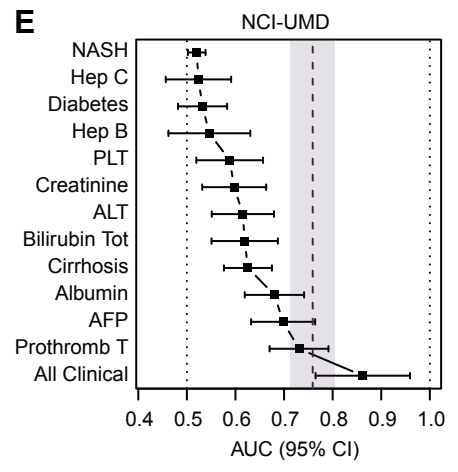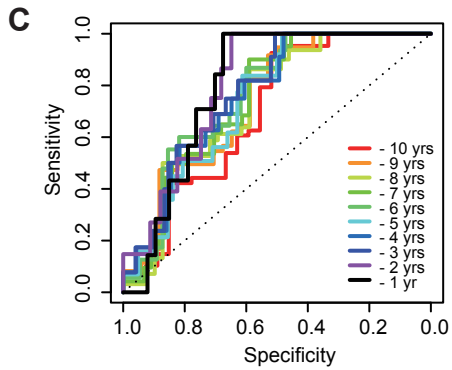

Supplement: NIHMS1598384-supplement-5.pdf [file NIHMS1598384-supplement-5.pdf]
